# Supplementary material for: The Borrelia burgdorferi telomere resolvase, ResT, possesses ATP-dependent DNA unwinding activity
Source: PubMed Central journal article supplement — Nucleic Acids Res. 2016 Dec 9;45(3):1319–29. doi: 10.1093/nar/gkw1243 (PMC5388405; doi:10.1093/nar/gkw1243), 2016-12-09
Supplement: gkw1243_Supp.pdf [file gkw1243_Supp.pdf]

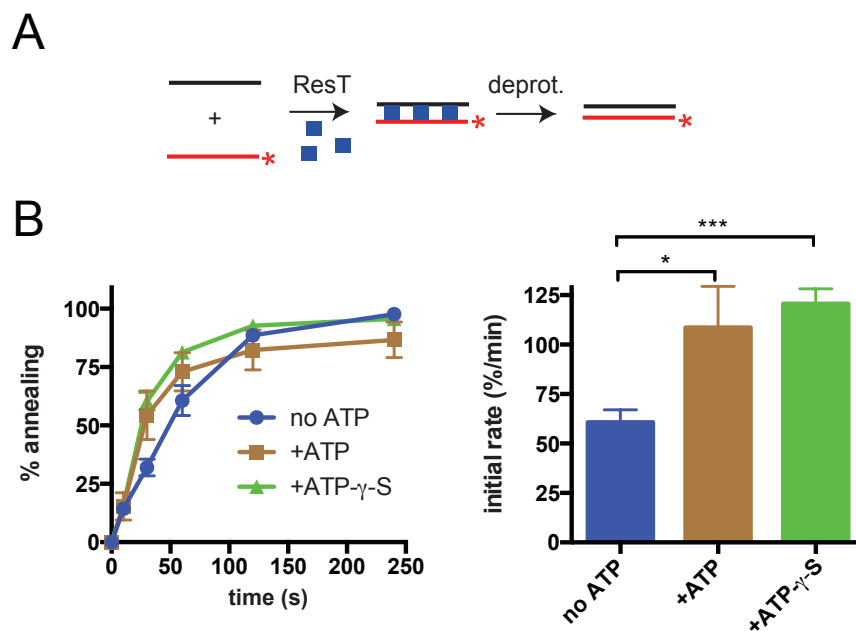

**Figure S1.** Single strand annealing assays performed in the presence of ATP.

A) Schematic representation of the single-strand annealing assay. Annealing reactions with 'naked DNA' involve a pair of complementary 35 nt oligonucleotides (OGCB664/665) with one oligo 5'-end-labeled with  $^{32}\text{P}$  (asterisk, red line) partnered with an unlabeled oligo (black line). Addition of ResT (blue squares) to the complementary oligonucleotides induces annealing.

B) The results of annealing assays performed with 'naked DNA' substrates represented as % annealing vs. time plots and as bar graphs showing the initial rates of reactions without ATP and reactions supplemented with ATP or ATP- $\gamma$ -S. Reactions were performed in triplicate and the mean and standard deviation is shown. Differences between the initial rates of annealing were examined using unpaired t-tests. \*  $P \leq 0.05$ , and \*\*\*  $P \leq 0.001$ .

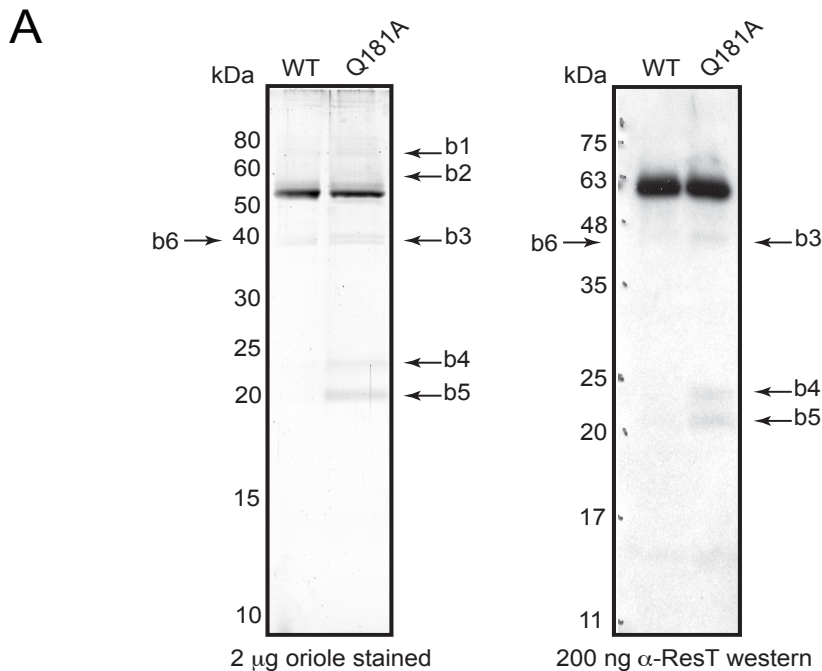

**B** Mass Spectrometry Summary Table

| Band             | Spectra | Unique peptides | Unique peptide score | Percent coverage | Protein MW (Da) | Species                     | SwissProt Accession # | Protein name |
|------------------|---------|-----------------|----------------------|------------------|-----------------|-----------------------------|-----------------------|--------------|
| b1               | 165     | 47              | 677.17               | 69.2             | 74915.1         | <i>E. coli</i>              | P77398                | ArnA         |
| b2               | 24      | 15              | 181.93               | 29.7             | 57499           | <i>E. coli</i>              | P0A6F5                | GroL         |
| b3 <sub>.1</sub> | 61      | 20              | 277.98               | 46.7             | 40619.6         | <i>E. coli</i>              | P06987                | HisB         |
| b3 <sub>.2</sub> | 164     | 45              | 573.41               | 62.6             | 54000           | <i>Borrelia burgdorferi</i> | custom database       | ResT         |
| b4 <sub>.1</sub> | 83      | 23              | 331.2                | 76.6             | 23811.2         | <i>E. coli</i>              | P0ACJ8                | CRP          |
| b4 <sub>.2</sub> | 92      | 34              | 385.45               | 55.2             | 54000           | <i>Borrelia burgdorferi</i> | custom database       | ResT         |
| b5 <sub>.1</sub> | 23      | 11              | 105.36               | 23.2             | 54000           | <i>Borrelia burgdorferi</i> | custom database       | ResT         |
| b5 <sub>.2</sub> | 51      | 10              | 114.48               | 46               | 19149.6         | <i>E. coli</i>              | P0A7B8                | HlsV         |
| b6 <sub>.1</sub> | 174     | 57              | 637.84               | 72.7             | 54000           | <i>Borrelia burgdorferi</i> | custom database       | ResT         |
| B6 <sub>.2</sub> | 47      | 21              | 235.36               | 57.4             | 40619.6         | <i>E. coli</i>              | P06987                | HisB         |

ArnA is a bifunctional polymyxin resistance protein with oxidative decarboxylation and formylation activity.  
 GroL is an ATP-dependent chaperonin in the context of GroEL-GroES and unfolded substrate.  
 HisB is a bifunctional histidine biosynthesis protein with histidinol-phosphatase and imidazoleglycerol-phosphate dehydratase activity.  
 CRP is a camp-activated global transcriptional regulator.  
 HlsV is the protease subunit of the ATP-dependent HlsVU protease complex.

**Figure S2.** Assessing the purity of wild type ResT and ResT (181A).

A) The left panel shows 15% SDS-PAGE gel analysis of 2  $\mu$ g of wild type (WT) and ResT (181A) preps visualized by oriole staining (image inverted). Possible contaminants are indicated by arrows and given a band designation (b1-6). The right panel shows 200 ng of each protein loaded to a 15% SDS-PAGE gel western blotted with a polyclonal  $\alpha$ -ResT antibody to detect ResT cleavage fragments.

B) Summary of top hits in the b1-6 areas of the preparative gel against the *E. coli* database or the custom ResT databases (where appropriate). The function/activity of the low level contaminants is summarized below the Table. Material for analysis was derived from a 15% SDS-PAGE preparative gel run without molecular weight markers in which 4  $\mu$ g of wild type (WT) and ResT (181A) preps were loaded and visualized by oriole staining. The b1-6 band regions were excised and subjected to in-gel tryptic digest followed by tandem MS-MS analyses. The results were run against an *E. coli* database and custom ResT and ResT (Q181A) databases constructed for the Spectrum Mill software.

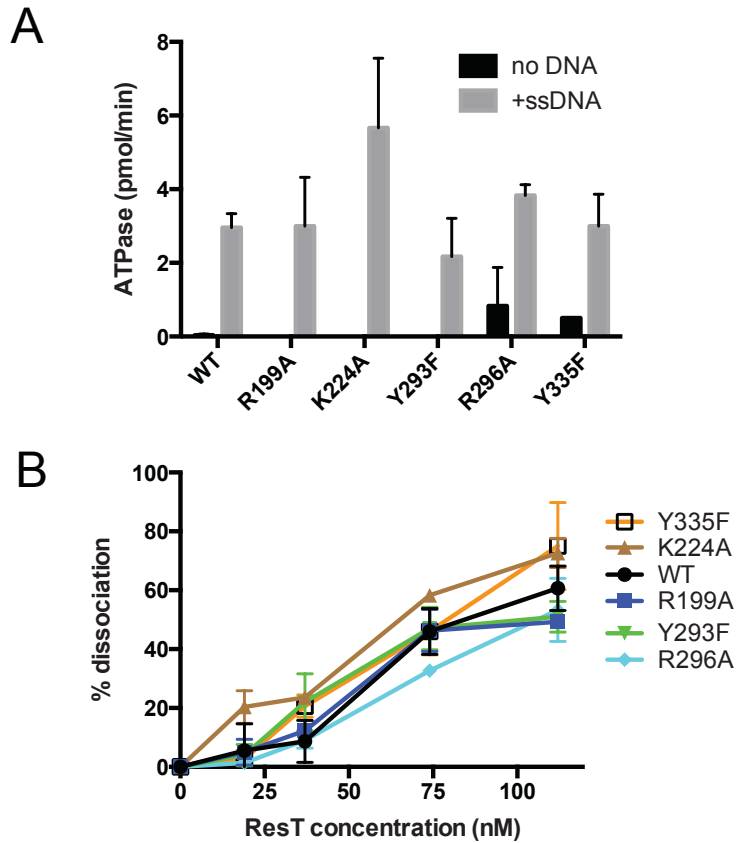

**Figure S3.** ATPase/helicase assays of ResT mutations in the telomere resolvase active site.

A) Summary of ATPase results of the indicated ResT variants,  $\pm$  10  $\mu$ g/mL  $\phi$ X174 virion. ATPase assays containing 74 nM ResT were incubated at 37°C for 120 min. The mean and standard deviation of at least three independent experiments is shown.

B) % strand dissociation vs. ResT concentration curves of the indicated ResT variants. The helicase assays were performed by 60 min incubation at 37°C, with 15 nM substrate. The substrate was used was a partial duplex with a 26 bp duplex region with a 50 nt 3'-tail assembled with 5'-end-labeled OGCB666 and unlabeled OGCB692 (see Supplementary Table S1). Reactions were performed in triplicate and the mean and standard deviation are shown.



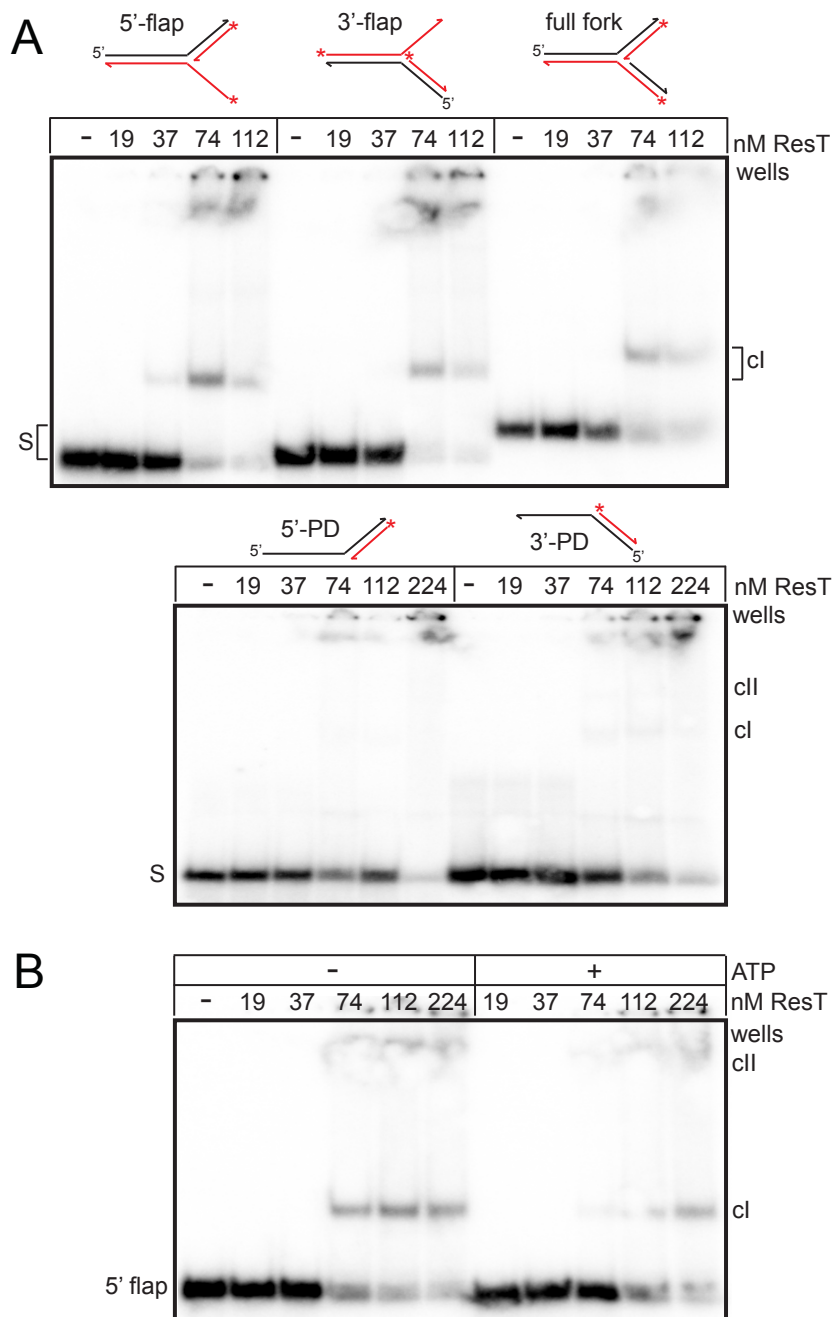

**Figure S5.** Electrophoretic mobility shift assays (EMSA) with wild type ResT and replication fork mimics. A) 6% PAGE 0.5X TBE EMSA analysis of wild type ResT with partial duplex (PD), 5'-, 3'-flap and full fork assemblies. The 5'-end-labeled substrates (S) are diagrammed above the gels and were present at 5.25 nM. ResT was added to the concentrations indicated in the loading key above the gels and incubated with substrate at 0°C for 20 min prior to gel loading. See the Supplemental Material and Methods section for additional details. Discrete ResT-DNA complexes are indicated by the designation cl and cII to the right of the gels. ResT has a tendency to produce wellshifts at higher concentrations, the position of the wells is indicated. B) 6% PAGE 0.5X TBE EMSA analysis comparing binding of ResT to the 5'-flap substrate in conditions -/+ 2 mM ATP.

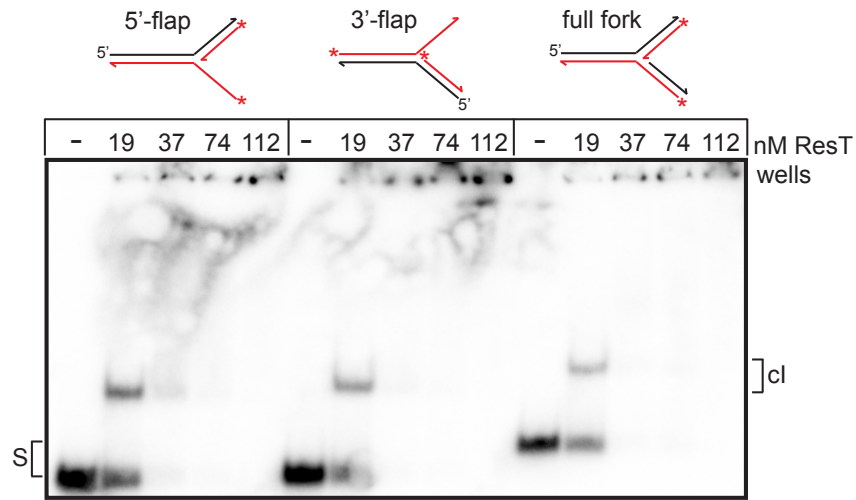

**Figure S6.** EMSA analysis of ResT (F92AF93AW94A) with replication fork mimics. 6% PAGE 0.5X TBE EMSA analysis of ResT (F92AF93AW94A) with 5'-, 3'-flap and full fork assemblies. The 5'-end-labeled substrates (S) are diagrammed above the gels and were present at 5.25 nM. ResT was added to the concentrations indicated in the loading key above the gels and incubated with substrate at 0°C for 20 min prior to gel loading. Discrete ResT-DNA complexes are indicated by the designation cl to the right of the gels. ResT has a tendency to produce wellshifts at higher concentrations, the position of the wells is indicated.

A

ResT telomere resolvase domain alignment

Pssm-ID: 293289 Cd Length: 274 Bit Score: 237.50 E-value: 1.24e-74

```

      10      20      30      40      50      60      70      80
gi 2689902  43 AENHKAILFrkDKFTNRSII--LNLSTKTRKIKEYinlsvierirrdntflffwksrrikelknigikdrkkieelifsNQ 121
Cdd:pfam16684 11 CEAEIALLR--NGLTQRTIIgTQISKYRKAIKEY-----LE 44
      90     100     110     120     130     140     150     160
gi 2689902  122 MNDEKsyfgyFIDLfVTPKWLNDYahkykiekinsyRKEQIFVKINLNTYIEIIK-----LLNQSRD 184
Cdd:pfam16684 45 LNDENS---ITKIFTDGKWLVDY-----HKALIYPKLAQRTYQQVRKdktnrpsfravryidtaLELLQSRD 108
      170     180     190     200     210     220     230     240
gi 2689902  185 IRLKfYGLVMAIGRRPVEVMKLSQFYIAD----KNHIRMEPIAKKREN--NIVNEVvfPVFADPELIINSIKIENR---Y 254
Cdd:pfam16684 109 YRSKVIgLYLLTGRHHEEVLKTKGFDIADkgkgvvsINSILFSGQAKKKEneAIPYEI--PVLAPPETILNAIKRLRengP 186
      250     260     270     280     290     300     310     320
gi 2689902  255 MEQPENLtkeiISSNLAYSYNRLFRQIFNNI---FAPEE---SVYFCRAIYCKFSLAFAPKMEMMYWITKVLGHPEND 328
Cdd:pfam16684 187 GEQPEGL---ISKELGLKVRREVRQLFQDfgpiPAGKetylSPHNLRSAYCAIAYQLFAPPNCTENYFVKAILGHTE 262
      330
gi 2689902  329 IRTAFHYNRYVL 340
Cdd:pfam16684 263 LQTAQSYLDYEL 274

```

ResT Meth (cobalamine/pterin) domain alignment from DELTA BLAST

Pssm-ID: 224328 [Multi-domain] Cd Length: 842 Bit Score: 35.78 E-value: 0.03

```

      10      20      30      40      50      60      70      80
gi 11497028 154 INSyrkeqIFVKINLNTYIEIIKLLInqsrdirLkFYG--VLMaIGRrpeVVMKLSQ---FYIADKNHIRMEPIAKKRE 227
Cdd:COG1410 124 VNS---INVEEGERPEKVAELV-----KKGaavVMTIDE---EGQARTaerkFEIAKRAYILTEVEVGFPE 186
      90     100     110     120     130     140
gi 11497028 228 NNIVNEVVFVPFADPELIINS---IKEIRYMEqtENLTKIIS--SNLAYSYNRLFRQIFNNIFAPE 289
Cdd:COG1410 187 DIFDPNVFPIATGIEHRNygvdTEIARRIK--KELPHVLTtlgLSNVSFGLGAVREVLNSVFLYE 253

```

TelN 'protelomerase' telomere resolvase domain alignment

Pssm-ID: 293289 Cd Length: 274 Bit Score: 70.71 E-value: 9.34e-14

```

      10      20      30      40      50      60      70      80
gi 9630493  233 IDYPTYMQSIYDILNPA-----TLFSLNTRSGMAPLAFALAAVSGRRMIEMFQGEFAVS-----GKYTVNFSGQ 298
Cdd:pfam16684 73 LAQRTYQVRKDKTNRPSfravryidTALELLQSRDRYSKVIgLYLLTGRHHEEVLKTKGFDIADkgkgvSINSILFSGQ 152
      90     100     110     120     130     140     150     160
gi 9630493  299 AKKRSEDKSVTRTIYTLCEAKLFVLLTELRScsaaSDFDEVVKGYGKDDTRSengRINAILAKAFNPWVKSFQDDDR 378
Cdd:pfam16684 153 AKKK--ENEAIPEYIPVLAPPETILNAIKRLRE---NGPGEQPEGLISKELGL---KVRREVRQLFQDIGPIAGKETYL 224
      170     180     190     200     210
gi 9630493  379 Y-KDSRAIYARIAYEMFfrvdpRWKNVDEDFVMEILGH--DDENTQLHYKQFKL 430
Cdd:pfam16684 225 SpHNLRSAYCAIAYQLF-----APPNCTENYFVKAILGHteNDLQTAQSYLDYEL 274

```

TelN 'protelomerase' P-loop NTPase domain alignment

Pssm-ID: 304359 Cd Length: 153 Bit Score: 36.09 E-value: 7.75e-03

```

      10      20      30      40      50      60      70
gi 9630493  176 DYLYKLFQOGSALLEELHQLKVNHEVLYHLQL--SPAERTSI--QQRWADVLREKKN---VVVIDYPTYMQSIYDILN 247
Cdd:pfam13614 57 DLYLYLRQDENLALLLKAMIYHDGGLDYLPprSPEDLRELSPPEWENLERLRETsiydVVLDDLGSVDDALALLE 135

```

TelK 'protelomerase' telomere resolvase domain alignment

Pssm-ID: 293289 Cd Length: 274 Bit Score: 70.33 E-value: 9.22e-14

```

      10      20      30      40      50      60      70      80
2V6EB  292 SGRMRIEMIQGEFSA-----GKYTVTLGQAKRSEDKGI SRKIYTLCDATLFSVLNLRSCPAAdfdEVIKGYG 365
Cdd:pfam16684 120 TGRHHEEVLKTKGFDIADkgkgvSINSILFSGQAKK--ENEAIPEYIPVLAPPETILNAIKRLRENGPG---EQPEGLI 194
      90     100     110     120     130     140     150     160
2V6EB  366 ENDTRSengRINAILATAFNPWVKTFGLDDRRVY--KDSRAIYARIAYEMFfrvdpRWKNVDEDFVMEILGH--DDENTQ 442
Cdd:pfam16684 195 SKELGL---KVRREVRQLFQDIGPIAGKETYLSpHNLRSAYCAIAYQLF-----APPNCTENYFVKAILGHteNDLQTA 266
      170     180     190     200
2V6EB  443 LHVKQFKL 450
Cdd:pfam16684 267 QSYLDYEL 274

```

TelK 'protelomerase' DELTA-BLAST UvrD domain alignment

Pssm-ID: 223288 [Multi-domain] Cd Length: 655 Bit Score: 35.94 E-value: 0.03

```

      10      20      30      40      50      60      70      80
2V6E_B  70 RKFRGKLEKRISANFNNSYMSRARKRFDDR--LHHNFEknvIKLSEKYPlySELSWSLs-----MPAASIRQHM SRL 141
Cdd:COG0210 68 LKLLGLPAAGLTVGTFHSPALRILRRHGERlgLNANFT---ILDSDQDALIKELLRRELnlddkeLLPREALRYISEA 144
      90     100     110     120     130     140     150     160
2V6E_B  142 QAKLKEIMPLAEDLSNikigtKNSEAKINKLANKYPEWQFAISDLNSDWDKRDYLYKLFQOGSSLEDLNnlKVNHeV 221
Cdd:COG0210 145 KNALLSPLEASALLA----AIKSEAEKLAELYEQEELLRLNLDLDFDLLLLLALRLLEENPEVLEALQA--RFRY--I 217
      170     180     190     200
2V6E_B  222 LY-HLQLSSAertsIQQRWANVLSKKRNvvVIDYPRymQAIY 263
Cdd:COG0210 218 LVDFQDTPN---LQYELLKLAGNAANLNVVGDD--QSIY 254

```

B

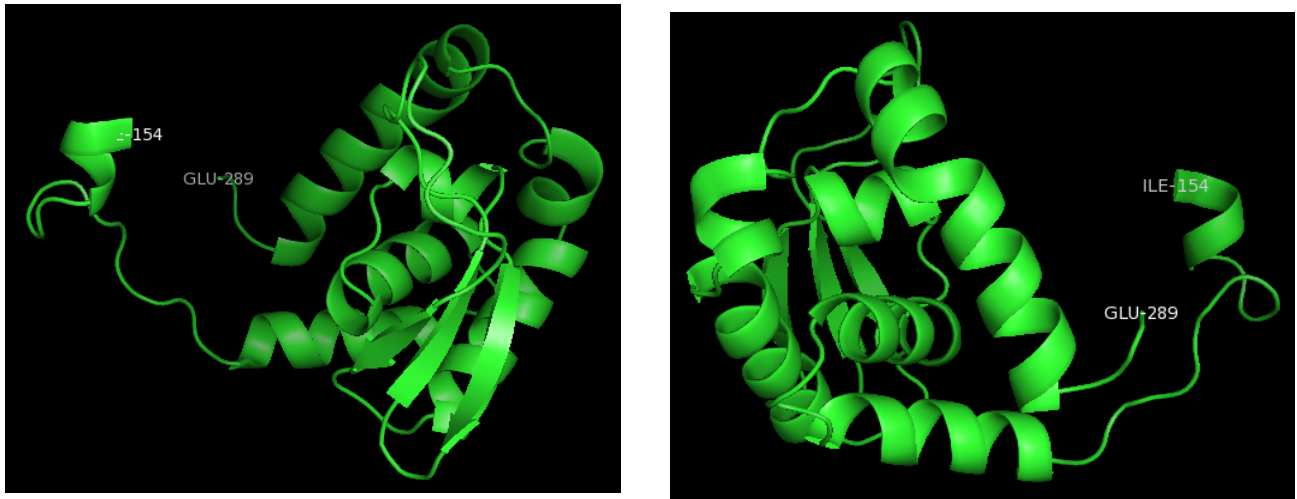

**Figure S7.** Putative conserved domains identified in the telomere resolvases, ResT, TelN and TelK. A) Show are alignments of ResT, TelN and TelK against putative conserved domains identified by PSI-BLAST and DELTA-BLAST searches (46, 47). In each telomere resolvase shown there is the expected strong homology to the telomere resolvase domain (pfam 16684) and a weak putative conserved domain homology to the pterin-binding domain of MetH (ResT), the AAA\_31 sub-type of P-loop NTPase's (TelN) and to the DNA helicase UvrD (TelK). B) One 2 One threading results for ResT (154-289) region against *Agrobacterium tumefaciens* telomere resolvase, TelA, the closest telomere resolvase relative to ResT with structural data available (pdb accession 4e0g). The ResT (154-289) model is shown in two orientations related by a 90° counter clockwise rotation. The 154 and 289 residues are labeled. The Phyre2 bioinformatics One 2 One threading software from Imperial College was employed (49).



**Table S1.** Oligonucleotides used in this study.

| <b>Oligo name</b> | <b>Oligo sequence</b>                                                                                                                              | <b>Use</b>                                                                                |
|-------------------|----------------------------------------------------------------------------------------------------------------------------------------------------|-------------------------------------------------------------------------------------------|
| OGCB455           | 5'-GATCATATCCTTTCTTTAAACTTCTATCATTGATTCTTACTAG<br>TCTTTACCTTACTATACTTCTATCAGTTTATCGATTCTTCTTTA-<br>3'                                              | 87 nt ssDNA; used in Fig. S1B.                                                            |
| OGCB456           | 5'-GATCTAAAGAAGAATCGATAAACTGATAGAAGTATAGTAAG<br>GTAAAGACTAGTAAGAATCAATGATAGAAGTTTAAAGAAAGGA<br>TAT-3'                                              | Complement of 455 to make a duplex DNA; used in Fig. S1B.                                 |
| OGCB409           | 5'-TCTGCGCCTCGTTCCGGCTAAGTAACATGGAGCAGGTCCG<br>CGGATT TCGACACAATTTATCAGGCGATGATACAAATCTCCGT<br>TGTACTTTGTTTCGCGCTTGGTATAATCGCTGGGGGTCAAAGA<br>T-3' | 126 nt bottom strand of polarity test substrate; used in Figs. 3 & 4.                     |
| OGCB666           | 5'-GTTACTTAGCCGGAACGAGGCGCAGA-3'                                                                                                                   | 26 nt strand to make polarity test substrate; used in Figs. 3 & 4.                        |
| OGCB667           | 5'-ATCTTTGACCCCCAGCGATTATACCA-3'                                                                                                                   | 26 nt strand to make polarity test substrate; used in Figs. 3 & 4.                        |
| OGCB669           | 5'-GTCGGATCCTCTAGACAGCTCCATGATCACTGGCACTGGT<br>AGAATTCGGC-3'                                                                                       | 50 nt leading template strand for fork mimic; used in Figs. 5, S4-S6.                     |
| OGCB670           | 5'-CAACGTCATAGACGATTACATTGCTACATGGAGCTGTCTAG<br>AGGATCCGA-3'                                                                                       | 50 nt lagging template strand for fork mimic; used in Figs. 5, S4-S6.                     |
| OGCB671           | 5'-TGCCGAATTCTACCAGTGCCAGTGAT-3'                                                                                                                   | 26 nt nascent leading strand for fork mimic; used in Figs. 5, S4-S6.                      |
| OGCB672           | 5'-TAGCAATGTAATCGTCTATGACGTT-3'                                                                                                                    | 26 nt nascent lagging strand for fork mimic; used in Figs. 5, S4-S6.                      |
| OGCB681           | 5'-TGTGGAATGCTACAGGCGTTCTAGTTTGTACTGGTACGAA<br>ACTCAGTGTTACGGTACATGGGTTCTATTGGGCTTGCTATCC<br>CTGAAAATGAGGGTGG-3'                                   | 100 nt top strand for D-loop substrates; used in Fig. 6.                                  |
| OGCB686           | 5'-CCACCCCTATTTTCAGGGATAGCAAGCCCAATAGGGGTAC<br>CGAGCTCGAATTCAGTGGCCGTCGTTCCAGTACAACTACAA<br>CGCCTGTAGCATTCCACA-3'                                  | 100 nt bottom strand for D-loop substrates; used in Fig. 6.                               |
| OGCB687           | 5'-AACGCCGGCCAGTGAATTCGAGCTCGGTACC-3'                                                                                                              | 31 nt strand with complementarity to the centre of 686; used to make D-loop in Fig. 6.    |
| OGCB688           | 5'-AGTCTTAAGCCTTGACTAGTCAGCTTACTAAGCGATTGAC<br>TAACGACGGCCAGTGAATTCGAGCTCGGTACCC-3'                                                                | 74 nt strand to make 5'-D-loop; used in Fig. 6.                                           |
| OGCB689           | 5'-AACGACGGCCAGTGAATTCGAGCTCGGTACCCAGTCTTAA<br>GCCTTGACTAGTCAGCTTACTAAGCGATTGACT-3'                                                                | 74 nt strand to make 3'-D-loop; used in Fig. 6.                                           |
| OGCB692           | 5'-TCTGCGCCTCGTTCCGGCTAAGTAACATGGAGCAGGTCC<br>GCGGATTTTCGACACAATTTATCAGGCGATGATACAAAT-3'                                                           | 76 nt strand to make 3'-partial duplex with 50 nt 3'-tail, use with 666; used in Fig. S3. |

|                 |                                                                               |                                                                                                   |
|-----------------|-------------------------------------------------------------------------------|---------------------------------------------------------------------------------------------------|
| OGCB562         | 5'-GAAATAATTAAGCTTCTACTGAATGCGAGTCGAGATATTAGATTAATAATTT-3'                    | Mutagenic oligo used to make the Q181A mutation; use with 563.                                    |
| OGCB563         | 5'-AAATTTTAATCTAATATCTCGACTCGCATTAGTAGAAGCTTAATTATTTTC-3'                     | Mutagenic oligo used to make the Q181A mutation; use with 562.                                    |
| OGCB524         | 5'-AGGATTAGAAGAGATAATACTTTTTTATTTGCGGCGAAATCAAGAAGAATAAAA-3'                  | Mutagenic oligo used to make the F93AW94A mutation; use with 525.                                 |
| OGCB525         | 5'-TTTTAATTCTTTTATTCTTCTTGATTTGCGGCGAAATAAAAAGTATTATCTCTTCTAATCCT-3'          | Mutagenic oligo used to make the F93AW94A mutation; use with 524.                                 |
| OGCB540         | 5'-AGAGATAATACTTTTTTGA GCGGCGGCGAAATCAAGAAGA-3'                               | Mutagenic oligo used to make the F92A mutation in the F93AW94A background; use with 541.          |
| OGCB541         | 5'-TCTTCTTGATTTGCGCGCGCTAAAAAAGTATTATCTCT-3'                                  | Mutagenic oligo used to make the F92A mutation in the F93AW94A background; use with 540.          |
| OGCB127         | 5'-GATCtctctaaccattgTCATTATACTAAAAGATAATAAATTAATTTATTATTAATTAGTATAAATA-3'     | Used to construct Type 2 <i>rTel</i> used in Figs. 2 and 4. Use with 128.                         |
| OGCB128         | 5'-GATCTATTTATACTAATTAATAATAAATTAATTTATTATCTTTTAGTATAATGAgcaatggtagagga-3'    | Used to construct Type 2 <i>rTel</i> used in Figs. 2 and 4. Use with 127.                         |
| OGCB674<br>-5'P | 5'-ATTCTTCTTCATTCTTCTATTATTA-3'                                               | 5'-phosphorylated nascent lagging strand for mobile fork in Fig. 7; use with 676, 697 and 698.    |
| OGCB676         | 5'-TAATAATAGAAGAATGAAGAAGAAT-3'                                               | Nascent leading strand for partially mobile fork used in Fig. 7; use with 674-5'P, 697 and 698.   |
| OGCB697         | 5'-AAAATAACACAATCAAAATATTGTGGATAATCAATCCATTCGAAATATTCTTCTTCTTCTTCTATTATTA-3'  | Leading arm template strand for partially mobile fork; in Fig. 7; use with 674-5'P, 676 and 698.  |
| OGCB698         | 5'-TAATAATAGAAGAATGAAGAAGAATTGAATGAATGGATTGATTATCCACAATATTTTGATTGTGTTATTTT-3' | Lagging arm template strand for partially mobile fork; in Fig. 7; use with 674-5'P, 676, and 697. |

## **Supplemental Materials and Methods**

### **Substrate labeling, assembly and purification**

All substrates were assembled by 5'-<sup>32</sup>P endlabeling the oligos with T4 polynucleotide kinase (PNK) and [ $\gamma$ -<sup>32</sup>P]ATP (37°C, 1 hour, using, 66 nM [ $\gamma$ -<sup>32</sup>P]ATP and 4 units of T4 PNK) followed by annealing reactions conducted in a waterbath brought to a boil and allowed to slowly cool to room temperature overnight. The annealing buffer contained 25 mM HEPES (pH 7.6), 0.1 mM EDTA and 50 mM NaCl. The substrate assemblies used to make the replication fork mimics for Figures 5 & S4 were excised from 8% PAGE 1X TAE gels. The DNA was recovered from the gels by crush and soak (4°C, overnight) followed by application of the soak over 0.45  $\mu$ m acetate spin filters (costar columns) followed by ethanol precipitation to concentrate the recovered substrates.

### **Single-strand annealing assays**

Annealing reactions with 'naked DNA' were performed by mixing fifteen-nanomolar unlabeled oligonucleotide OGCB665 into buffer containing 25 mM HEPES (pH 8.2), 2 mM MgCl<sub>2</sub>, 1 mM DTT, 100  $\mu$ g/ml bovine serum, 50 mM NaCl and 2 mM ATP or ATP- $\gamma$ -S. This mixture was chilled on ice for 2 min, to inhibit the rate of spontaneous annealing. 15-nM 5' -<sup>32</sup>P endlabeled oligonucleotide OGCB664 and ResT were added followed by incubation at 30°C. Timepoints were taken by removing 18  $\mu$ L aliquots, from the 120  $\mu$ L master annealing reactions, to tubes with pre-aliquoted sodium dodecyl sulphate (SDS) stop dye containing an excess unlabeled OGCB664 to prevent further annealing after reaction termination. The 5X stop dye contains 100 mM Tris-HCl (pH 7.6), 10 mM MgCl<sub>2</sub>, 3% SDS, 30% glycerol, 0.024% bromophenol blue and 600nM unlabeled reporter oligonucleotide.

Electrophoretic analysis was performed on 20 X 20 cm vertical gels with 8% PAGE 1XTAE/0.1% SDS at 13 V/cm for 105 min followed by gel drying, exposure of the gels to phosphor screens and analysis on a BioRad FX phosphorimaging machine. Reactions were performed in triplicate and the data were quantitated with BioRad's Quantity One software according to the manufacturer's instructions. Reaction curves and statistics were generated with Prism's GraphPad 6.0.

### **Electrophoretic mobility shift assays**

Binding reactions with 5.25 nM 5'-<sup>32</sup>P-endlabeled substrates were performed in binding buffer (25 mM HEPES [pH 8.2], 2 mM mM MgCl<sub>2</sub>, 1 mM DTT, 100  $\mu$ g/mL BSA, 78 ng/mL heparin sulphate, 50 mM NaCl) by incubation at 0°C for 20 min with the concentration of ResT indicated in the figure. Where indicated, ATP was added to a final concentration of 2 mM. The samples were prepared for gel loading by addition of 5X load dye to a 1X concentration. 5X load dye contains 200 mM EDTA (pH 8), 32% glycerol, and 0.024% bromophenol blue. 10 cm x 10 cm gels 6% PAGE 0.5X TBE gels were run at 15V/cm in the cold room until the bromophenol blue was 3 cm from the bottom of the gel. The gels were dried and exposed to a phosphorimaging screen for visualization.

### Mass Spectroscopy Analysis

Material for analysis was derived from a 15% SDS-PAGE preparative gel run without molecular weight markers in which 4 µg of wild type (WT) and ResT (181A) preps were loaded and visualized by oriole staining. The b1-6 band regions were excised and subjected to in-gel tryptic digest followed by tandem MS-MS analyses. The results were run against an *E. coli* database and custom ResT and ResT (Q181A) databases constructed for the Spectrum Mill software. The MS analysis was performed by the Core Mass Spectroscopy Facility of the College of Medicine, University of Saskatchewan, Saskatoon, Canada.

### Supplementary References

46. Boratyn, G.M., Schaffer, A.A., Agarwala, R., Altschul, S.F., Lipman, D.J. and Madden, T.L. (2012) Domain enhanced lookup time accelerated BLAST. *Biol Direct*, **7**, 12.
47. Marchler-Bauer, A., Derbyshire, MK., Gonzales, NR., Lu, S., Chitsaz, F., Geer, LY., Geer, RC., He, J., Gwadz, M., Hurwitz, DI., Lanczycki, CJ., Lu, F., Marchler, GH., Song, JS., Thanki, N., Wang, Z., Yamashita, RA., Zhang, D., Zheng C. and Bryant, SH. (2015) CDD: NCBI's conserved domain database. *Nucleic Acids Res*, **43**, D222-D226.
49. Kelley, L.M., S., Yates, CM., Wass, MN. and Sternberg, MJE. (2015) The Phyre2 web portal for protein modeling, prediction and analysis. *Nat Protoc*, **10**, 845–858.
